# Supplementary material for: Monovalent copper-mediated UV to NIR luminescence down-shifting in Yb3+-doped glass
Source: Royal Society of Chemistry journal article supplement (doi:10.1039/d2tc03088h), 2022-01-01
Supplement: d2tc03088h1.pdf [file d2tc03088h1.pdf]

## Supporting Information

# Monovalent copper-mediated UV to NIR luminescence down- shifting in Yb<sup>3+</sup>-doped glass

José A. Jiménez\*

*Department of Chemistry & Biochemistry, Georgia Southern University, Statesboro, GA 30460, USA*

\*E-mail: [jjimenez@georgiasouthern.edu](mailto:jjimenez@georgiasouthern.edu) ; [jimenez.materials@gmail.com](mailto:jimenez.materials@gmail.com)

### ORCID:

José A. Jiménez: [0000-0001-9256-3836](https://orcid.org/0000-0001-9256-3836)

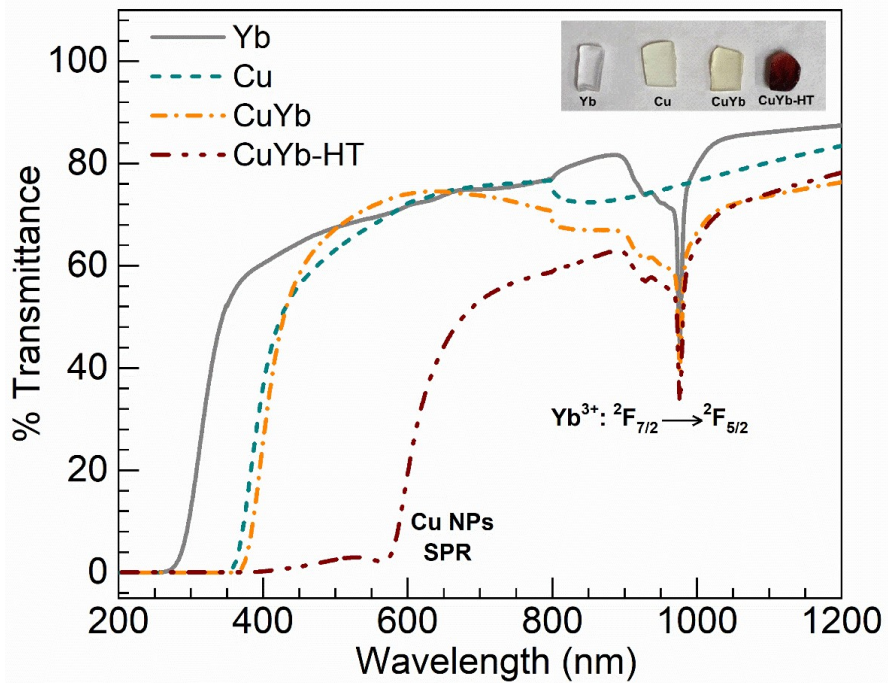

**Fig. S1.** The UV-Vis-NIR transmission spectra of the various glasses. The inset shows photographs of some samples of the studied glasses.

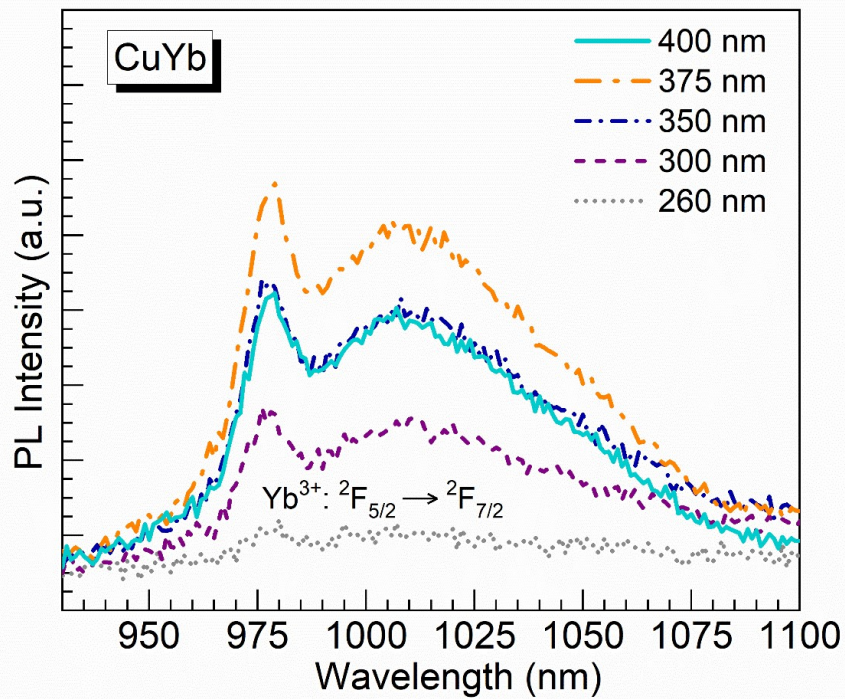

**Fig. S2.**  $\text{Yb}^{3+}$  NIR emission spectra obtained for the CuYb glass under different excitation wavelengths as displayed.

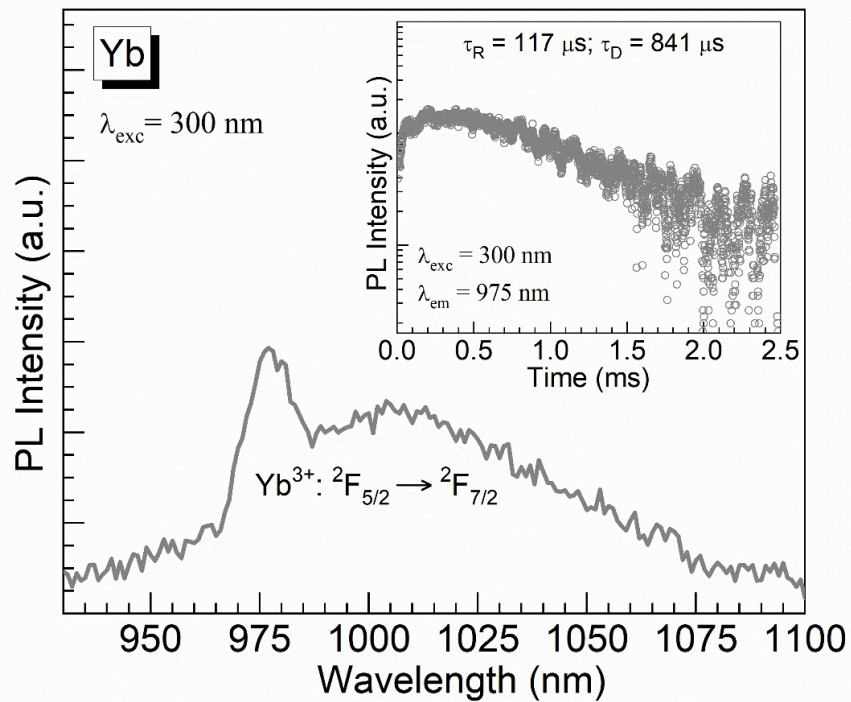

**Fig. S3.** Yb<sup>3+</sup> NIR emission spectrum obtained under excitation at 300 nm for the Yb reference glass. The inset shows the semi-log plot of the emission decay curve obtained for the Yb glass under excitation at 300 nm by monitoring Yb<sup>3+</sup> emission at 975 nm.
